# Supplementary material for: The C-terminal loop of the homing endonuclease I-CreI is essential for site recognition, DNA binding and cleavage
Source: PubMed Central journal article supplement — Nucleic Acids Res. 2007 Apr 22;35(10):3262–71. doi: 10.1093/nar/gkm183 (PMC1904291; doi:10.1093/nar/gkm183), 2007-04-22

# Supporting material figure 1.-

**a**

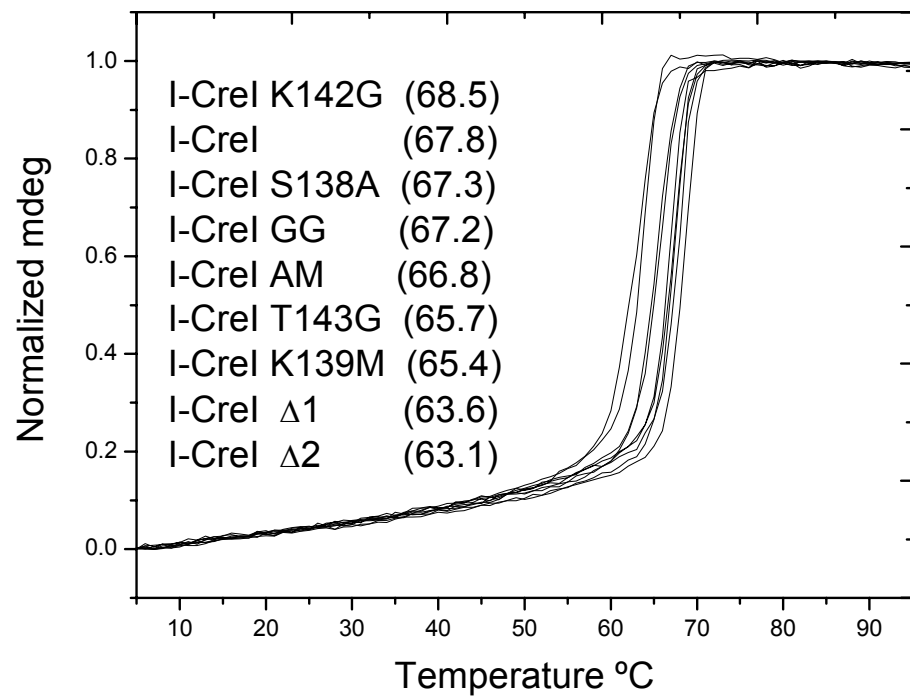

**b**

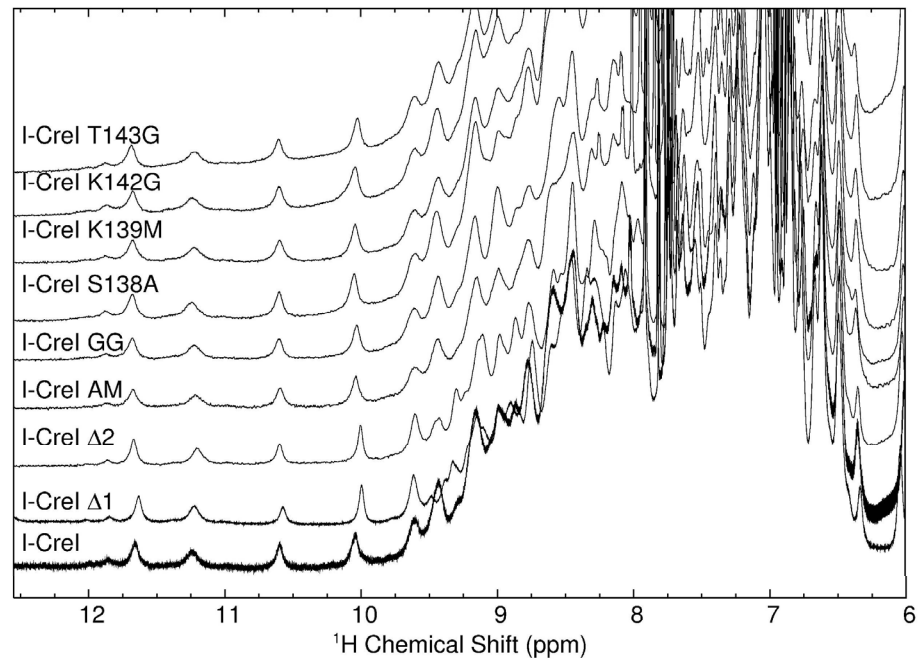

# Supporting material figure 1.-

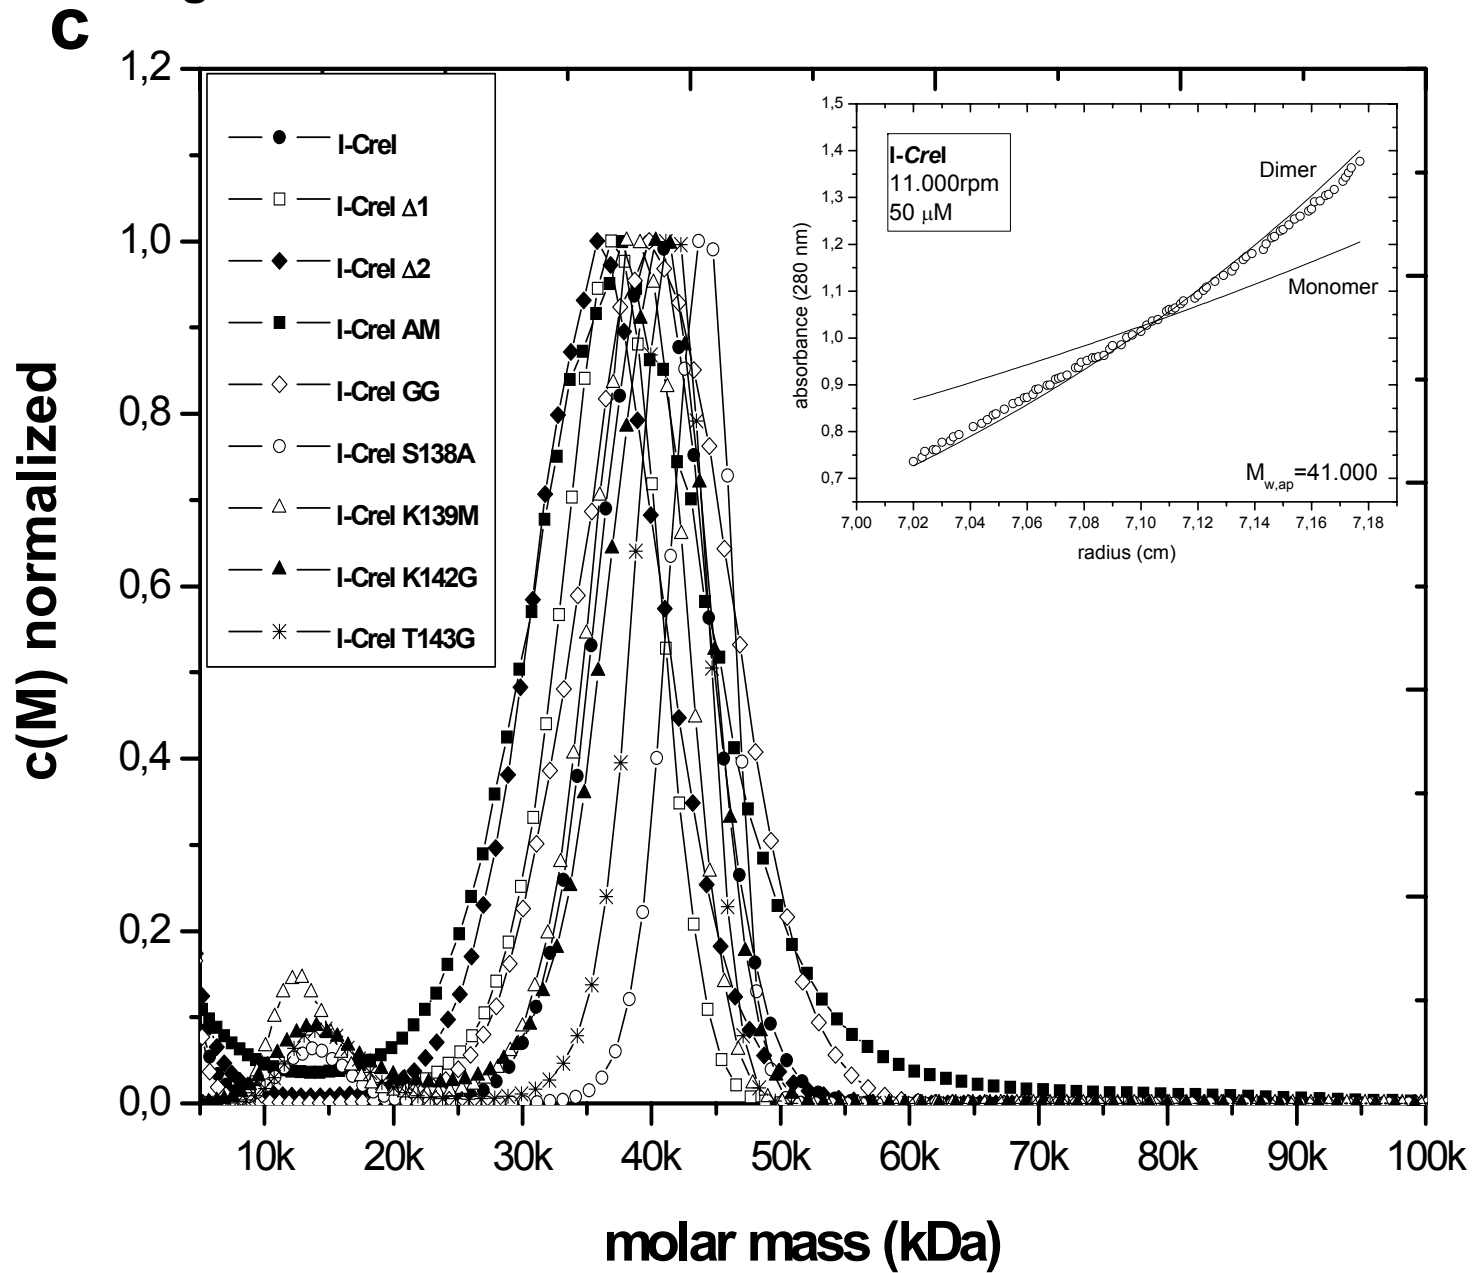

**Supporting material figure 1.-** Biophysical characterization of the I-Crel C-terminal region mutants. **a)** Circular dichroism thermal denaturation. **b)** One dimensional  $^1\text{H}$  NMR spectra. **c)** Analytical ultracentrifugation measurements. Sedimentation velocity distribution of the I-Crel proteins (1mg/ml in PBS buffer) at 42,000 rpm and 20°C. Inset, sedimentation equilibrium gradient of I-Crel proteins (4mg/ml in PBS buffer) at 11,000 rpm and 20°C. Open circles represent the experimental data, the two solid lines represent the theoretical gradients of a I-Crel monomer (20,045 Da) and dimer (41,000 Da).

**Gels for the dissociation constants ( $K_D$ )**

**Ca<sup>2+</sup>**

**I-Crel wt (nM)**

0 100 200 300 500 750 1000 1500 2000 3000 4000 6000 10000

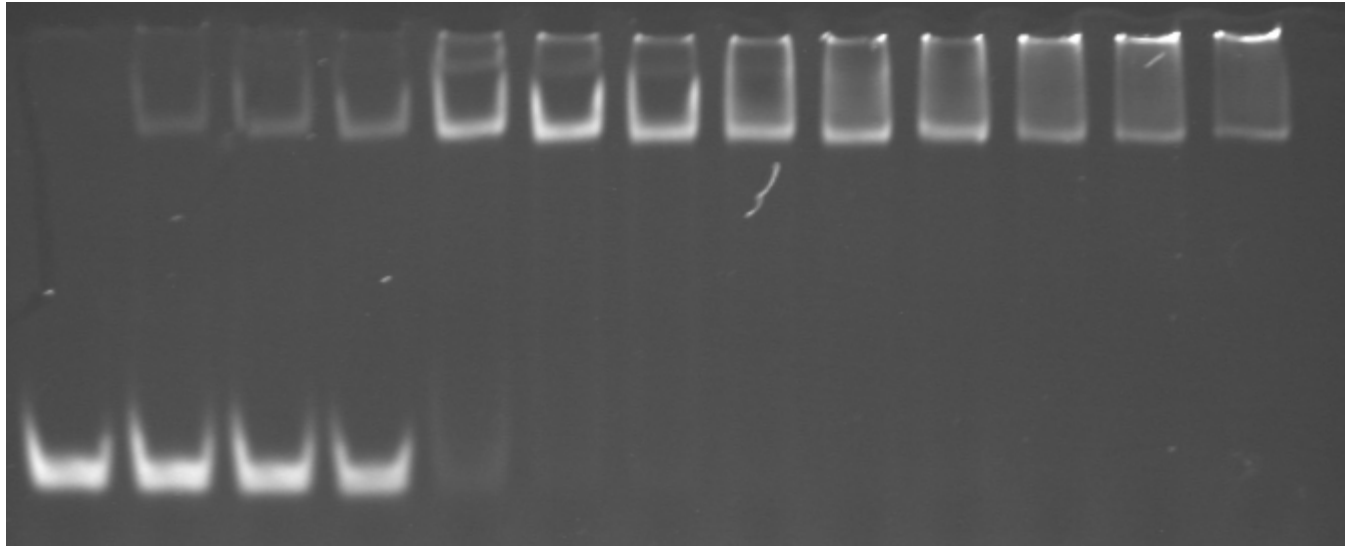

**Ca<sup>2+</sup>**

**I-Cre1 T143G (nM)**

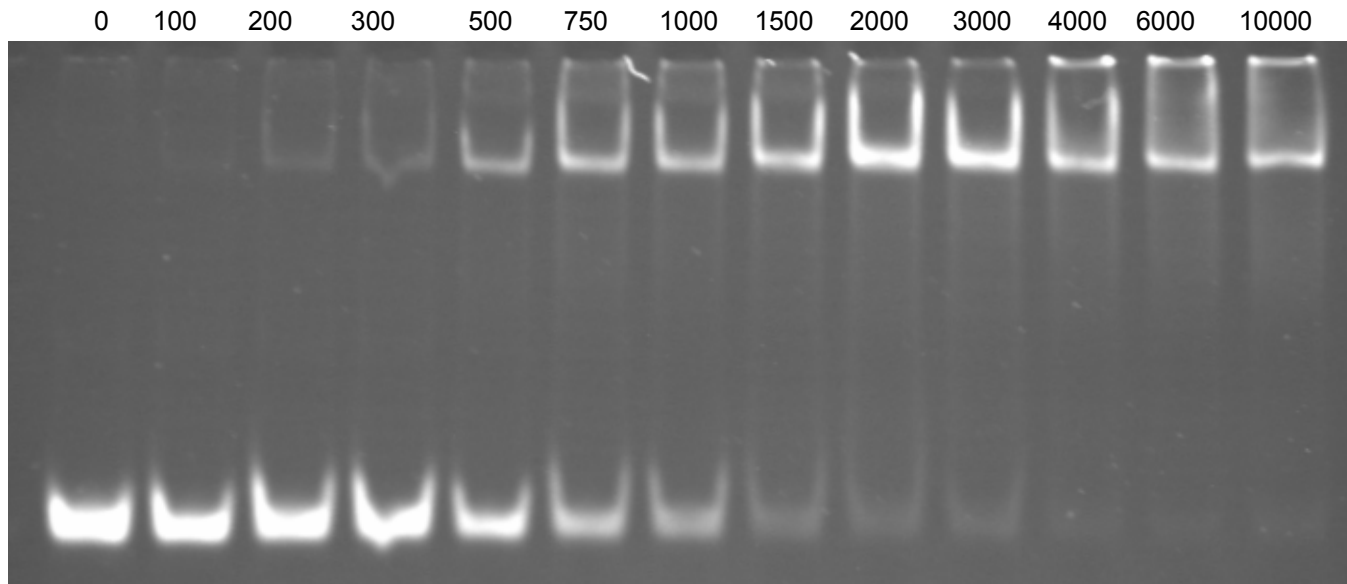

**Ca<sup>2+</sup>**

**I-Cre1 K142G (nM)**

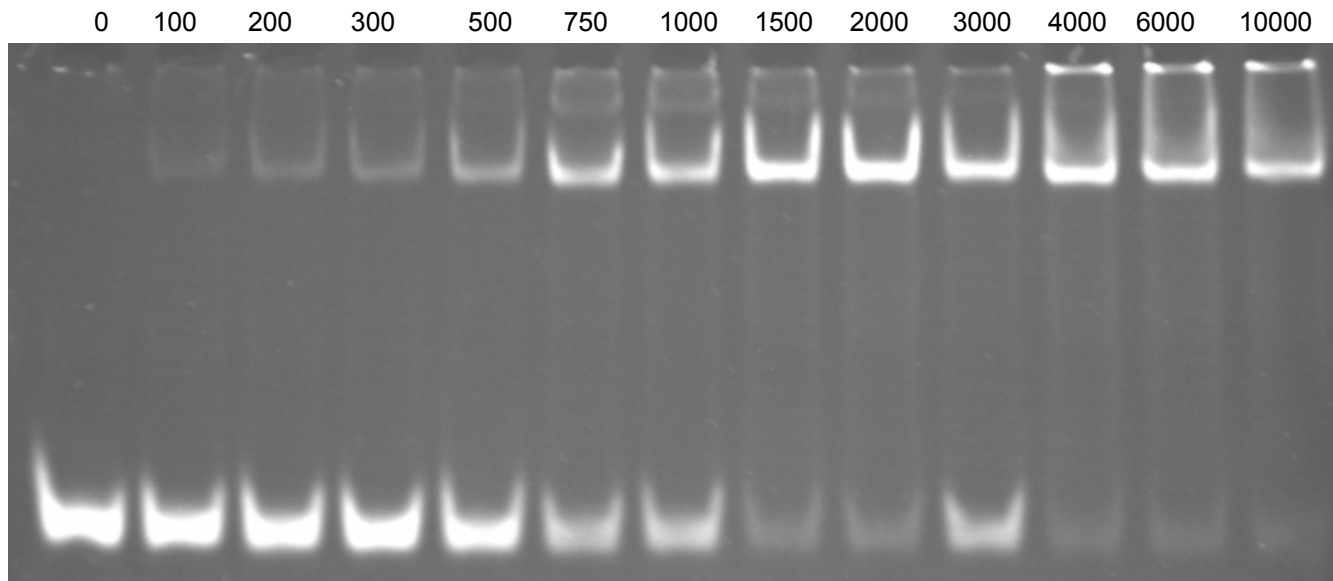

**Ca<sup>2+</sup>**

**I-Cre1 S138A (nM)**

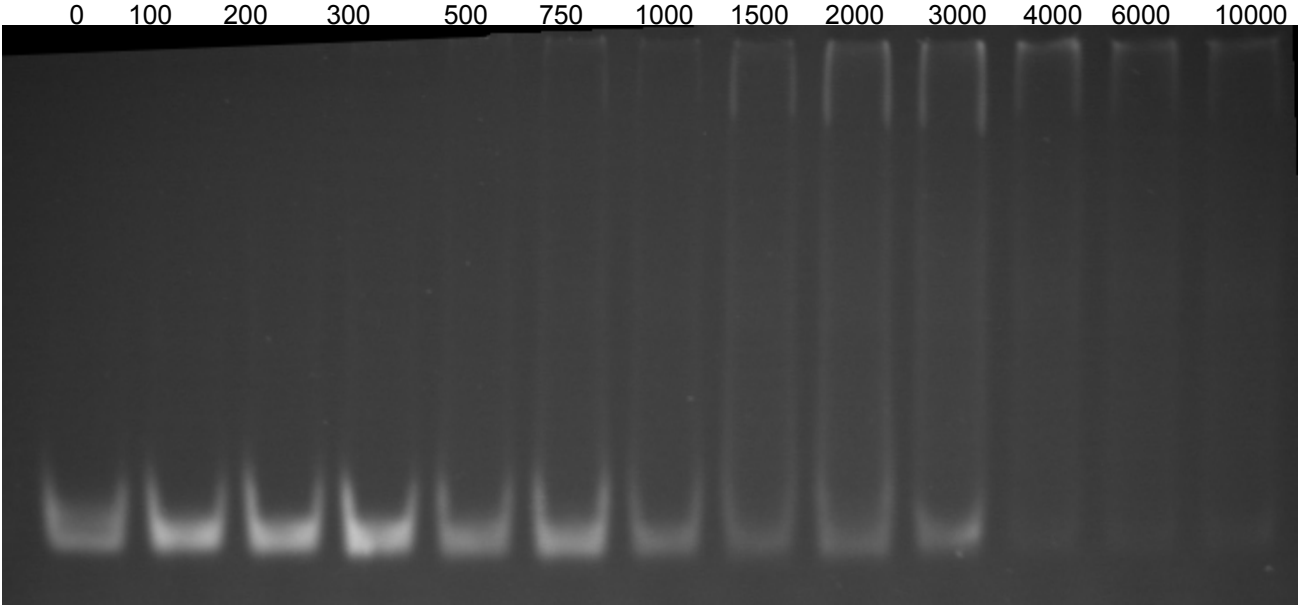



**Ca<sup>2+</sup>**

**I-Crel K139M (nM)**

0 100 200 300 500 750 1000 1500 2000 3000 4000 6000 10000

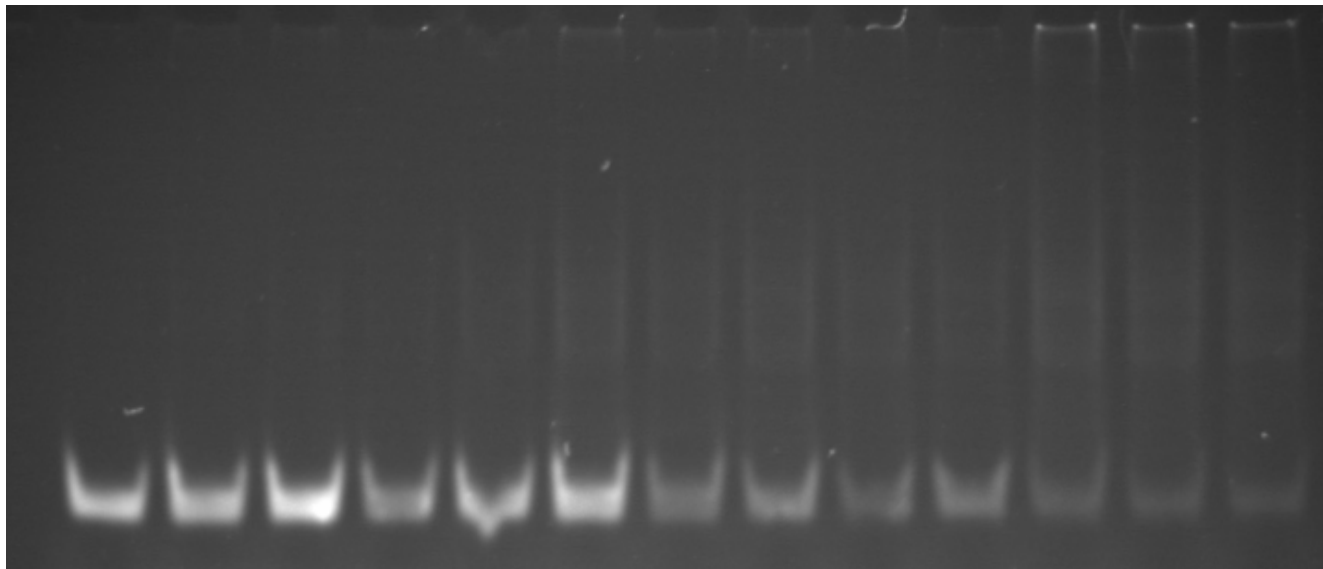

**Ca<sup>2+</sup>**

**I-Crel Δ2 (nM)**

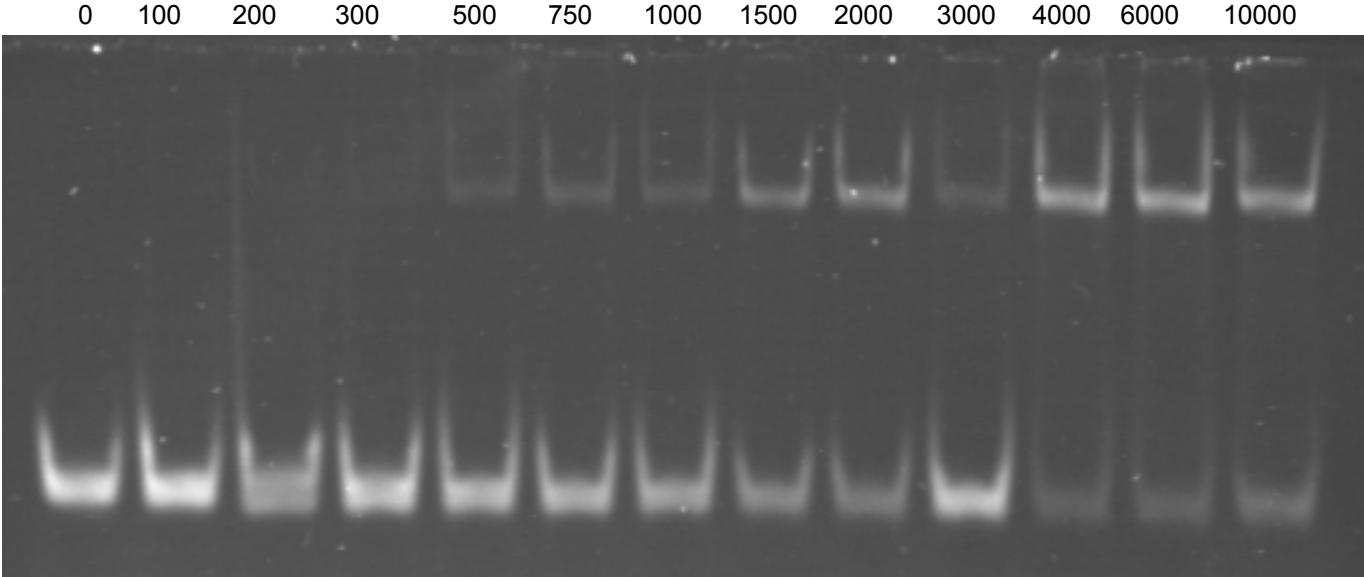

**Ca<sup>2+</sup>**

**I-Crel GG (nM)**

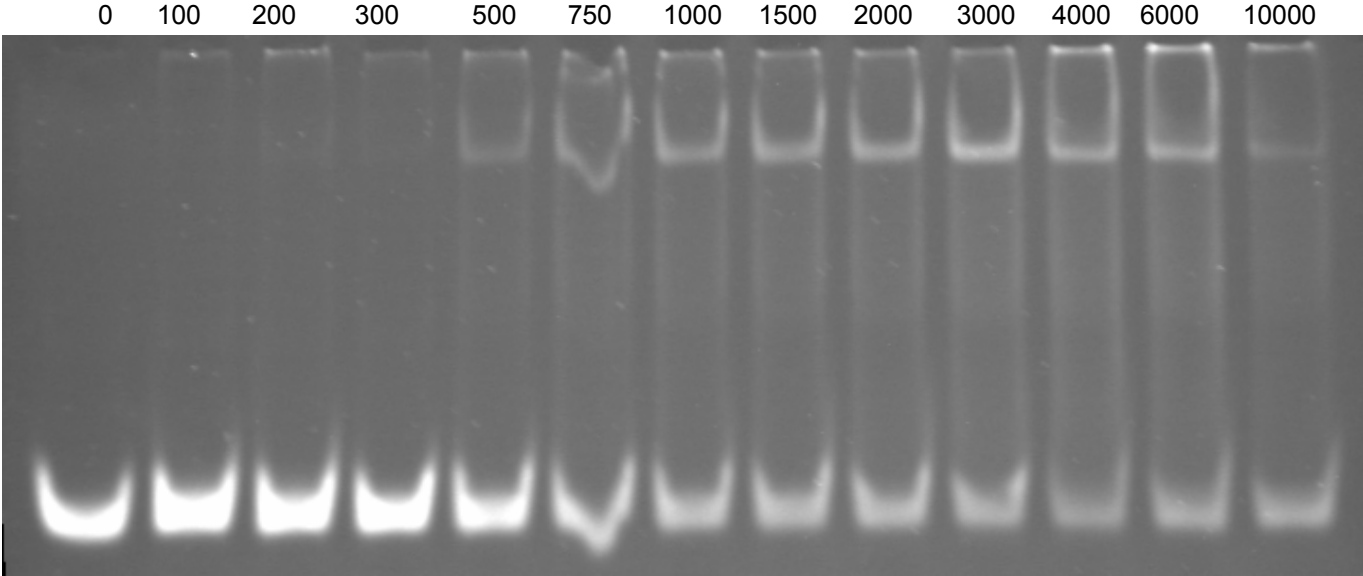

**Ca<sup>2+</sup>**

**I-Crel AM (nM)**

0 100 200 300 500 750 1000 1500 2000 3000 4000 6000 10000

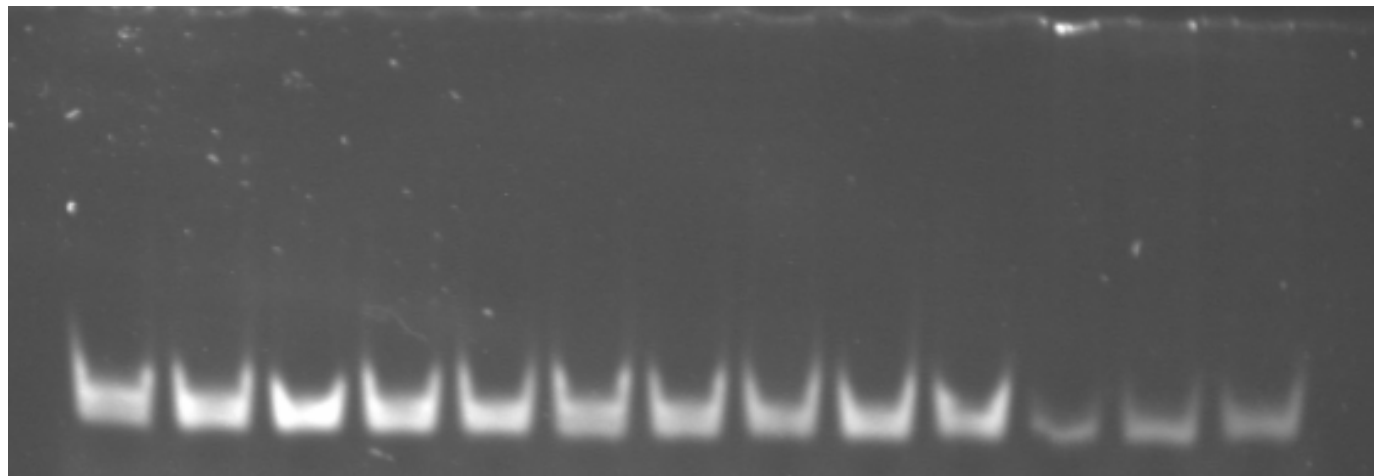

**Ca<sup>2+</sup>**

**I-Crel Δ1 (nM)**

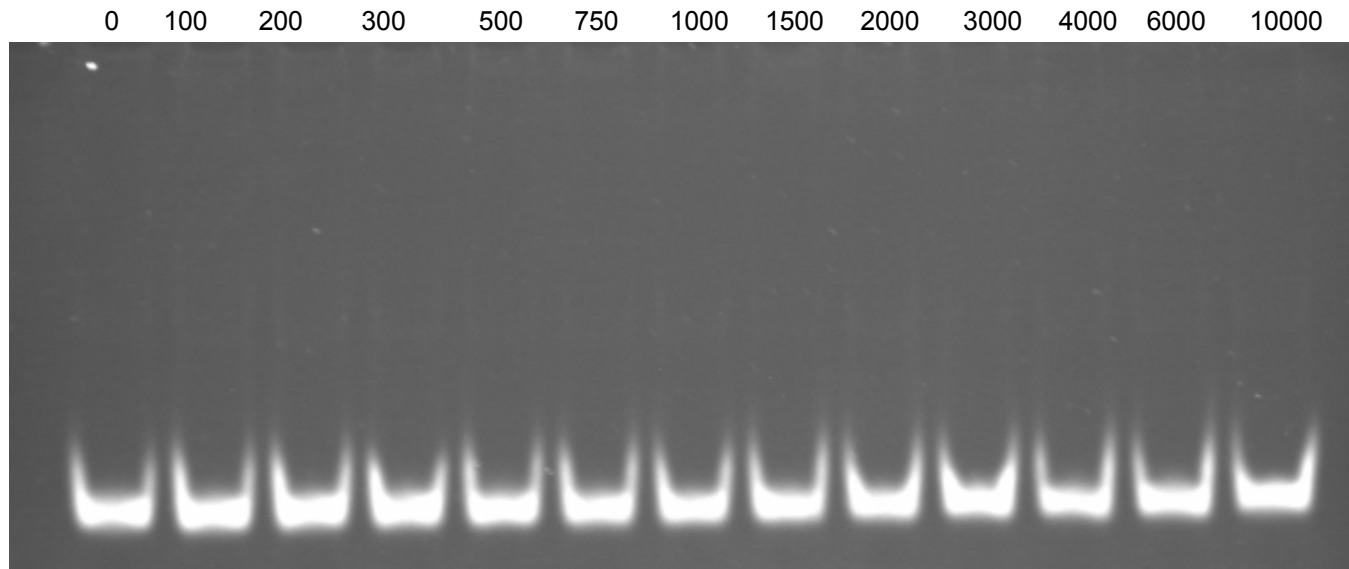

**Gels for the cleavage  $C_{50}$**

**Mg<sup>2+</sup>**

**I-Crel wt (ng)**

120 90 60 40 30 20 10 7,5 5 3,5 2 1 0,5 0,25 0

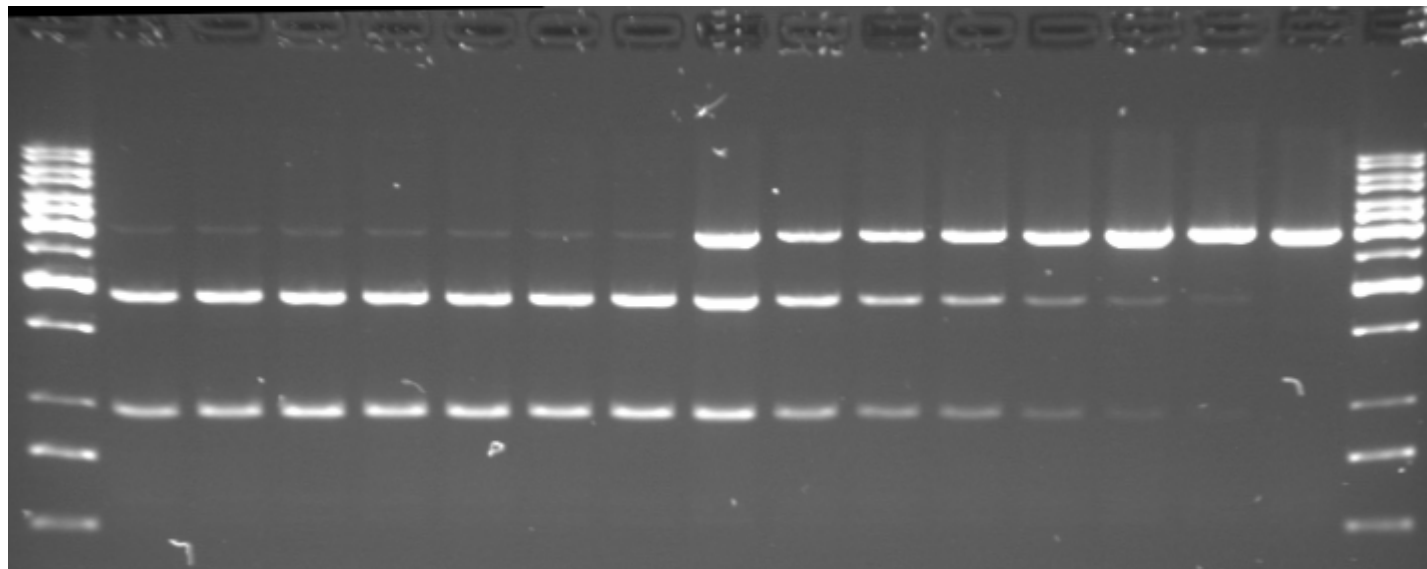

**Mg<sup>2+</sup>**

**I-Crel T143G (ng)**

120 90 60 40 30 20 10 7,5 5 3,5 2 1 0,5 0,25 0

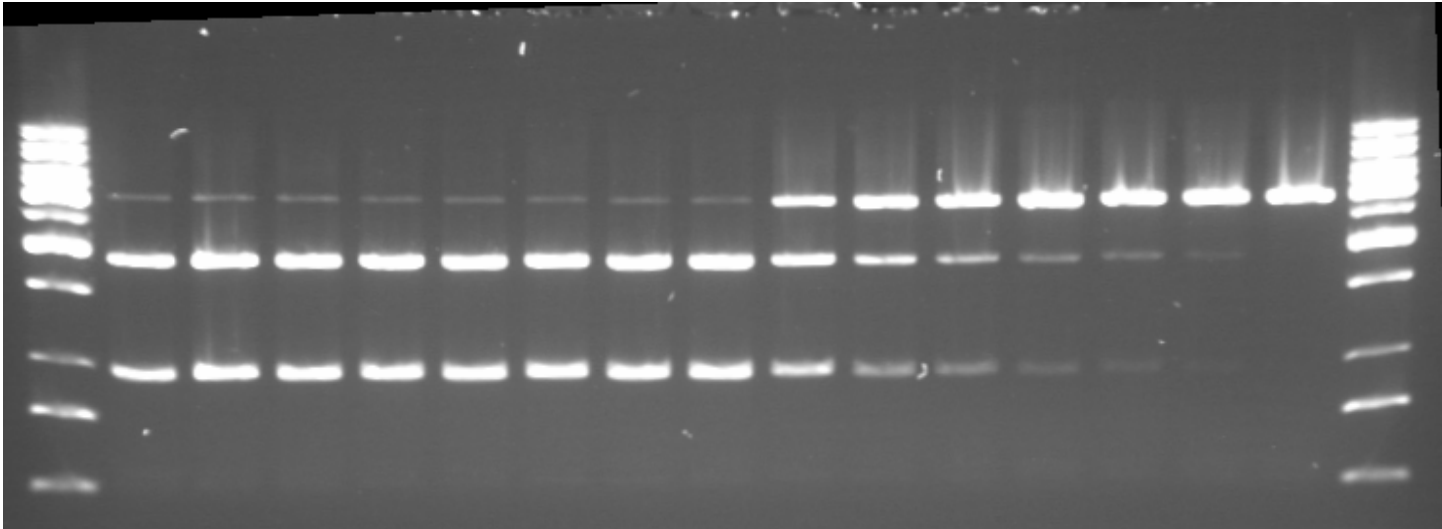



**Mg<sup>2+</sup>**

**I-Crel K142G (ng)**

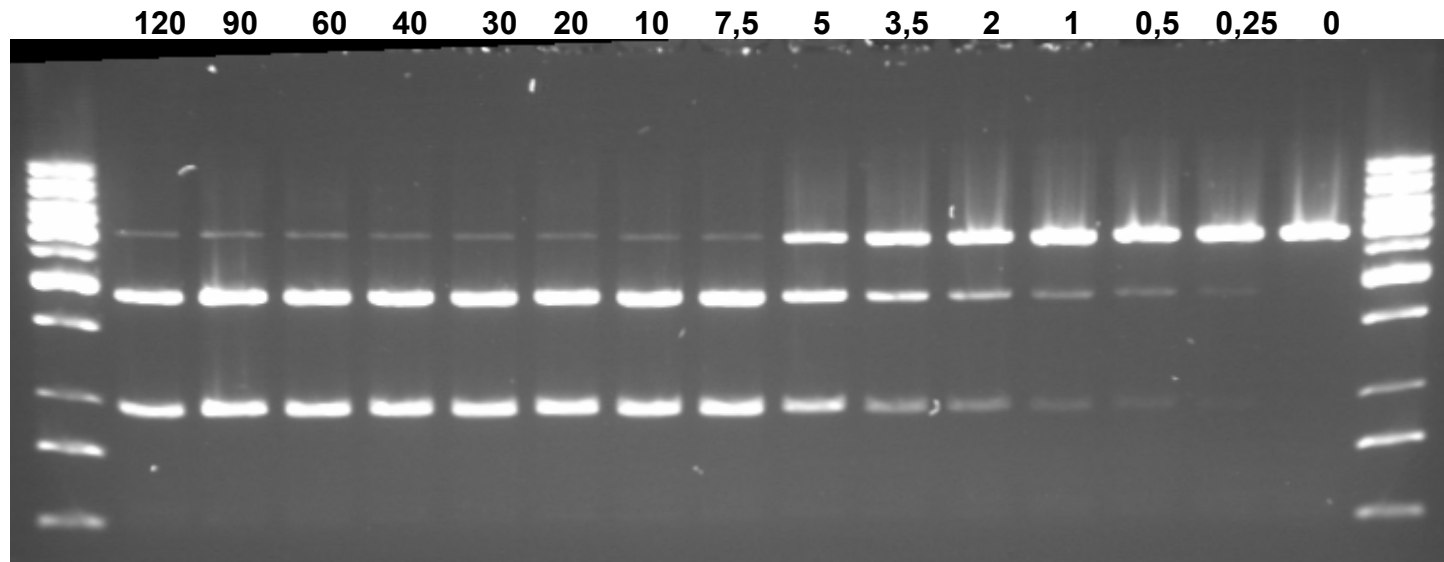

**Mg<sup>2+</sup>**

**I-Crel K139M (ng)**

120 90 60 40 30 20 10 7,5 5 3,5 2 1 0,5 0,25 0

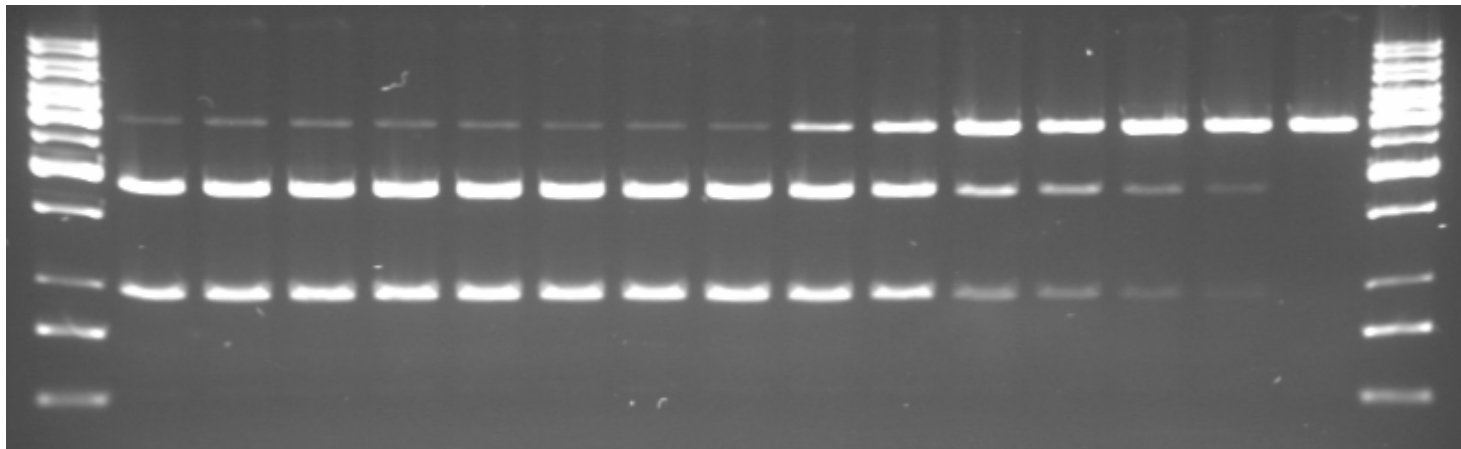

**Mg<sup>2+</sup>**

**I-Crel S138A (ng)**

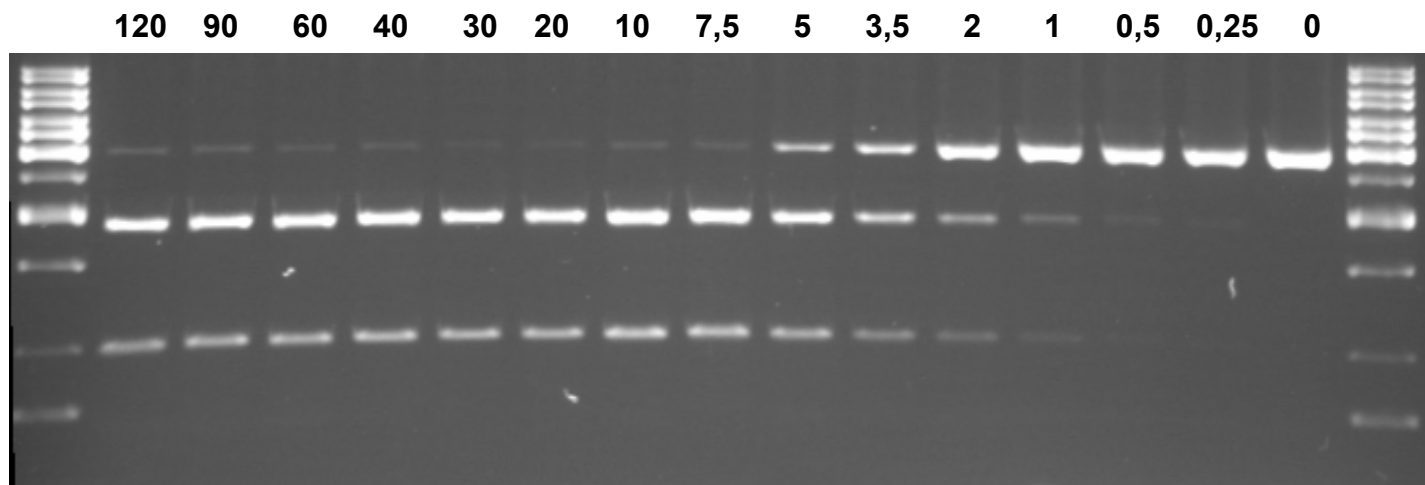

**Mg<sup>2+</sup>**

**I-Crel Δ2 (ng)**

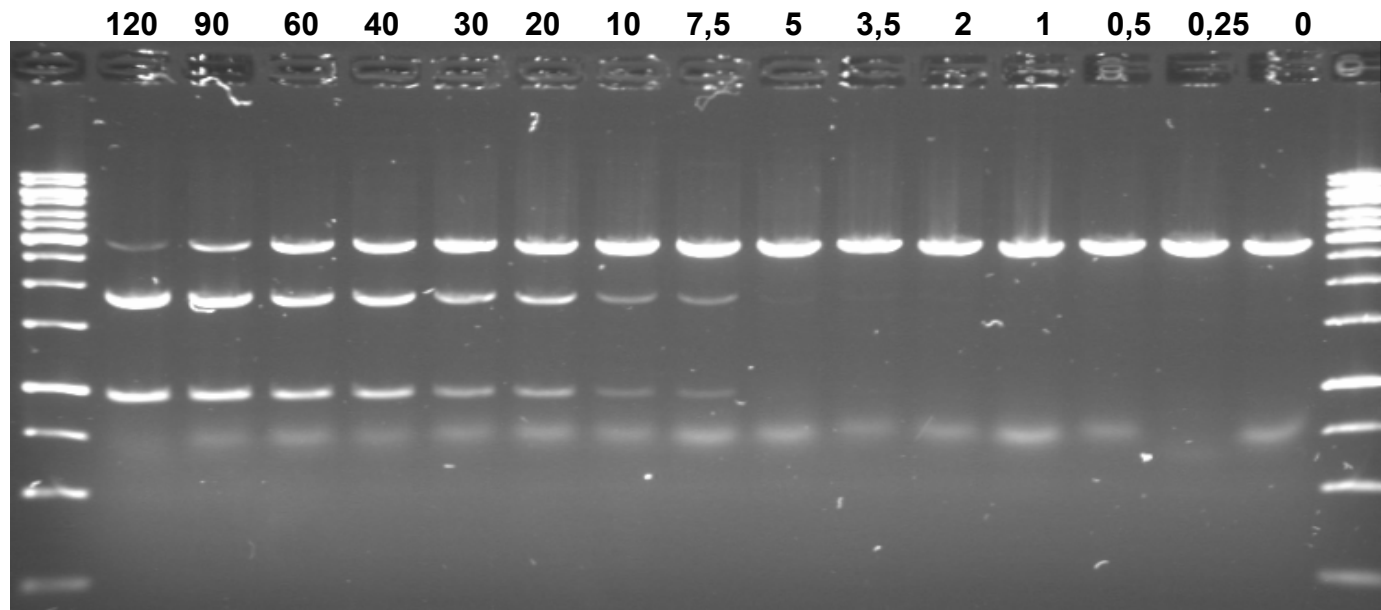

**Mg<sup>2+</sup>**

**I-Crel AM (ng)**

120 90 60 40 30 20 10 7,5 5 3,5 2 1 0,5 0,25 0

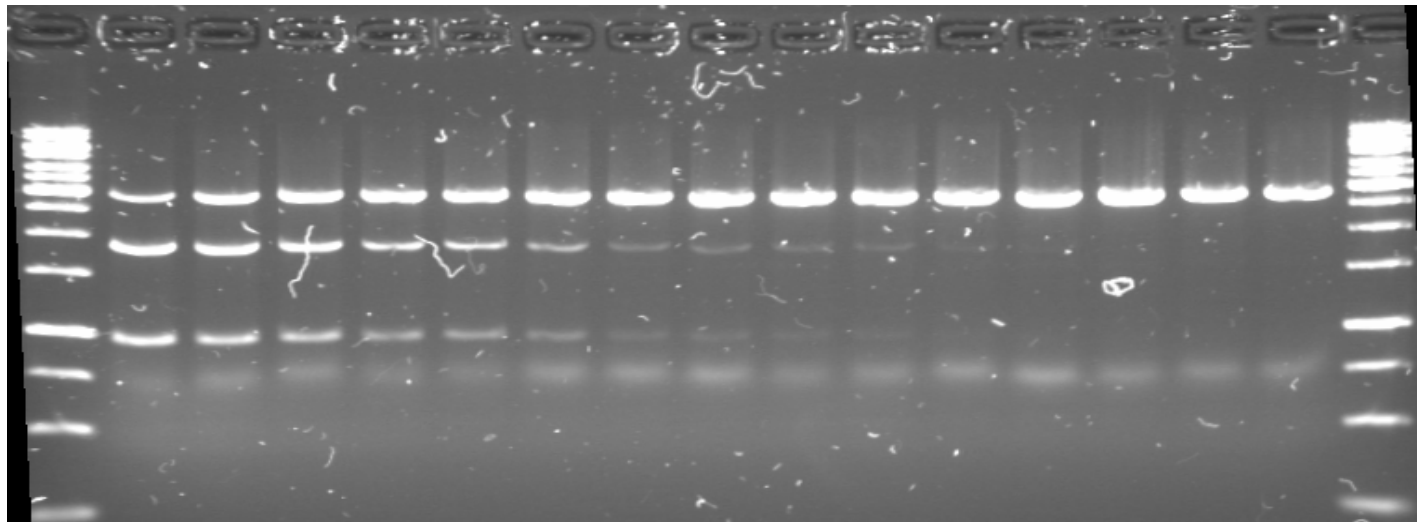

**Mg<sup>2+</sup>**

**I-Crel GG (ng)**

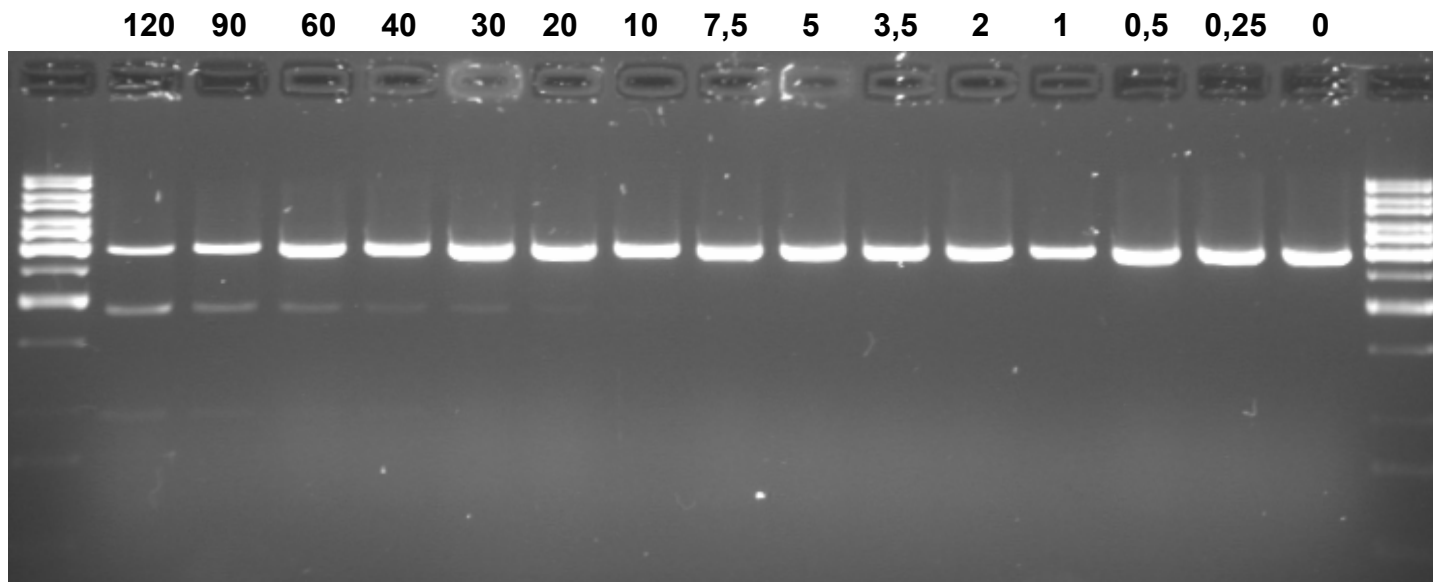

**Mg<sup>2+</sup>**

**I-Crel Δ1 (ng)**

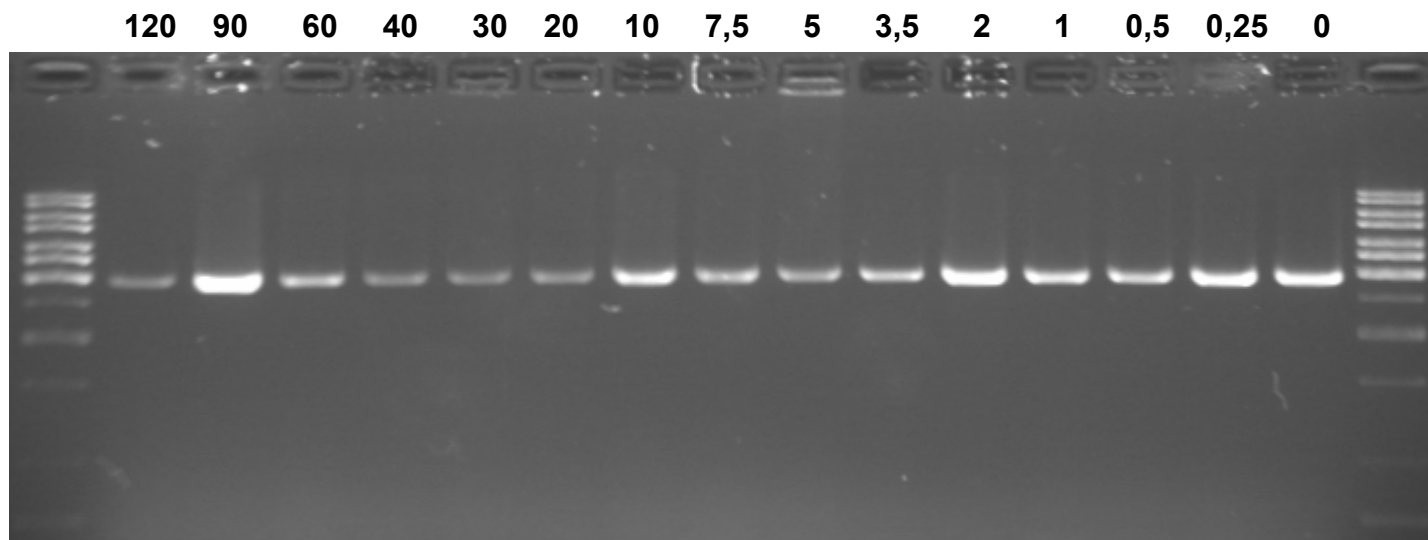

Supplement: nar_gkm183_1.pdf [file nar_gkm183_1.pdf]
